# Supplementary material
Source: MDPI journal article supplement (https://www.mdpi.com/2071-1050/8/12/1322)
Supplement: s1 [file s1]

# Supplementary Materials: Variations in the Use of Resources for Food: Land, Nitrogen Fertilizer and Food Nexus

María José Ibarrola-Rivas and Sanderine Nonhebel

## 1. Supplementary Material 1: Validation of the Calculation of Nitrogen Fertilizer Use per Ton of Food

We have calculated the use of nitrogen fertilizer per ton of food for each food category in the diet (Tables 1 and 2) to calculate the nitrogen fertilizer use per person. We have used country level data to illustrate differences of production systems. Several assumptions had to be made due to the availability of data.

First, we combined crop production data from two databases: nitrogen application rate from FertiStat (FAO, 2007) and crop yield from FAOSTAT (FAO, 2013a). These databases give country level data averaging the crop production systems of each country. The production systems within each country can differ due to local conditions (climate, type of soil, management practices, others).

Second, in some cases, only a share of the harvested area in a country is fertilized. FertiStat indicates, for each crop, the average application rate of the fertilized area, and the share of the harvested area that is fertilized. In the cases that only a share of the harvested area is fertilizer, we calculate a “weighted” application rate and we used it as the application rate of country for that crop. The reason to use this “weighted” application rate is because we combine it with crop yield data of all the harvested area of the country given by FAOSTAT.

It is questionable whether with these assumptions our results illustrate real situations of production systems. In order to validate our assumptions, we compare the data we have used and our calculations of kilogram of nitrogen fertilizer per ton of crop with some case studies. These case studies have crop field scale production data of nitrogen application rate and crop yields for several crops. Similar to Table 1, we combined the nitrogen application rate and crop yield to calculate the kilograms of nitrogen fertilizer per ton of crop (Table S1).

Table S1 show that for each food category, the nitrogen application rate, the crop yield and the kilogram of nitrogen fertilizer per ton of crop is in the same order of magnitude as the values of Table 1. The crops for each food category in Table S1 are ordered from high to low nitrogen application, similar to Table 1. In this way, it is easier to compare the values.

For cereals, the case study of maize in the USA in Table S1 has a similar nitrogen application rate (155 kg·N/ha), crop yields (9 ton/ha) and kg nitrogen fertilizer per ton of crop (16 kg·N/ton) than the maize production of the High Input Systems (HIS A and B) that we used for our calculations (Table 1). Similarly, the wheat production in the USA and in the valley farm in India (Table S1) has similar values than the maize production in the MIS A and in LIS, respectively, used in our calculations (Table 1). Similar comparisons are shown in the other food categories.

Also, the differences among food categories in the kilogram of nitrogen fertilizer per ton of crop resulted from the case studies (Table S1) is similar to our calculations (Table 1). The kilogram of nitrogen fertilizer per ton of cereals of Table S1 ranges from 2 kg·N/ton to 24 kg·N/ton, similar to Table 1 in which it ranges from 7 kg·N/ton to 26 kg·N/ton. Roots, vegetables and fruits show lower values in both tables: lower than around 10 kg·N/ton. Vegetable oils show large deviations among the crops, similar in both tables.

To conclude, Table S1 validate our assumption in order to use our methodology to illustrate global differences among production systems.

**Table S1.** Crop field scale production data from several sources.

| Crop       | N Application<br>(kg-N/ha) | Crop Yield<br>(ton/ha) | kg-N/ton<br>Crop | Case Study Area       | Source                       |
|------------|----------------------------|------------------------|------------------|-----------------------|------------------------------|
| Cereals    |                            |                        |                  |                       |                              |
| Maize      | 155                        | 9.4                    | 16               | USA                   | Pimentel (2009)              |
| Barley     | 84                         | 4.9                    | 17               | Iran                  | Mobtaker et al. (2010)       |
| Wheat      | 68                         | 2.9                    | 24               | USA                   | Pimentel (2009)              |
| Wheat      | 8                          | 1.5                    | 5                | Valley farm, India    | Triphathi and Sah (2001)     |
| Wheat      | 2                          | 0.9                    | 2                | Mid-hill farm, India  | Triphathi and Sah (2001)     |
| Roots      |                            |                        |                  |                       |                              |
| Potato     | 319                        | 44                     | 7                | USA                   | Pimentel (2009)              |
| Cassava    | 90                         | 19                     | 5                | Nigeria               | Pimentel (2009)              |
| Potato     | 33                         | 3                      | 12               | Valley farm, India    | Triphathi and Sah (2001)     |
| Pulses     |                            |                        |                  |                       |                              |
| Peas       | 27                         | 4.6                    | 6                | High-hill farm, India | Triphathi and Sah (2001)     |
| Dry beans  | 16                         | 1.5                    | 11               | USA                   | Pimentel and Pimentel (2008) |
| Pulses     | 0                          | 0.5                    | 0                | Valley farm, India    | Triphathi and Sah (2001)     |
| Oil crops  |                            |                        |                  |                       |                              |
| Soybeans   | 156 <sup>1</sup>           | 3.2                    | 48               | Iran                  | Mohammedi (2013)             |
| Soybeans   | 4                          | 2.6                    | 1                | USA                   | Pimentel (2009)              |
| Rapeseed   | 3                          | 0.2                    | 17               | Valley farm, India    | Triphathi and Sah (2001)     |
| Vegetables |                            |                        |                  |                       |                              |
| Tomato     | 75                         | 80                     | 1                | USA                   | Pimentel (2009)              |
| Cabbage    | 27                         | 11                     | 2                | High-hill farm, India | Triphathi and Sah (2001)     |
| Fruits     |                            |                        |                  |                       |                              |
| Apple      | 50                         | 54                     | 1                | USA                   | Pimentel (2009)              |

<sup>1</sup> The application rate is not only for Nitrogen (N) but also includes Potassium (K) and Phosphorus (P).

## 2. Supplementary Material 2: Discussion of Our Assumption of Using Maize as the Only Feed Crop for Livestock

One of the assumptions that we have made in our calculations is that all livestock is fed with maize. We have decided to do this in order to have only one value for both nitrogen application and crop yield for each animal food product. In this way, it is possible to illustrate how each factor of the feed crops drives the use of nitrogen fertilizer per kilogram of animal food product (e.g., beef, poultry, etc.). For example, if the rate of nitrogen application is small but also the crop yield is small, then the nitrogen fertilizer per kilogram of food could be similar to another production system in which the nitrogen fertilizer rate is larger but can give larger crop yields (see Table 1).

However, in reality, livestock is fed with a mixture of feed crops as well as with grass from pastures. The mixture of feed can vary not only from country to country but also from farm to farm. It can vary daily due to international food prices and availability of feed crops, as well as many other factors. Therefore, our calculations do not illustrate the real use of nitrogen fertilizer of each country. However, by using only one feed crop, it illustrates how different production systems can drive the use of nitrogen fertilizer by using country level data as examples of real production systems.

Nevertheless, the variation that can result from our assumption in comparison with using other type of feed crops is not significant for the purpose of our paper. The reason for this is that by looking at the values of kg-N/ton-food, the differences among the types of animal food products are larger than the differences that can result from using different types of feed crops. This is shown in Table S2. This table shows the same calculations as Table 2 for the use of nitrogen fertilizer to produce a ton of animal food product but in this case it is calculated by using other types of feed crops. This table shows the values for all main feed crops which are available in the FertiStat Database for each country. Note that the numbers of each column are in the same order of magnitude (comparing the different type of feed) in comparison with the rows for which the difference is larger (comparing the type of animal food product). For example, for France, the kg-N/ton food varies around 1% to up to 40% among feed crops, but the differences among animal

food products is larger: pig meat is five times smaller than beef, and milk is 15 times smaller than beef. Similar differences are shown for the other countries.

Note that if soya is used as feed crop, then the kg-N/ton food is significantly smaller in comparison with the other feed crops. Soya is a legume in comparison with the other feed crops which are cereals. The reason for this difference is that legumes are nitrogen fixators therefore they require much less synthetic nitrogen fertilizer as other crops. Therefore, it is important to point out that our results in general are an overestimation if the feed crop is a legume. However, this is not always the case since in some production systems the nitrogen application for legumes could be relatively large resulting in high use of nitrogen per amount of food. For example, see the case of Mexico in which the kg-N/ton food for barley is only 15% larger than soya.

**Table S2.** Use of nitrogen fertilizer per amount of food for all animal food products by using different feed crops.

| Feed Crop                                  | Feed Factors                                   |                                     |                            | Animal Food Product kg-N/ton Food <sup>c</sup> |        |          |         |      |      |
|--------------------------------------------|------------------------------------------------|-------------------------------------|----------------------------|------------------------------------------------|--------|----------|---------|------|------|
|                                            | Nitrogen Application <sup>a</sup><br>(kg-N/ha) | Crop Yield <sup>b</sup><br>(ton/ha) | kg-N/ton Feed <sup>c</sup> | Beef                                           | Mutton | Pig Meat | Poultry | Milk | Eggs |
| <b>France (High Input System A)</b>        |                                                |                                     |                            |                                                |        |          |         |      |      |
| Maize                                      | 170                                            | 9.1                                 | 18.7                       | 356                                            | 249    | 7        | 52      | 21   | 43   |
| Wheat                                      | 80                                             | 7.1                                 | 11.2                       | 214                                            | 149    | 44       | 31      | 12   | 26   |
| Barley                                     | 120                                            | 6.3                                 | 19.0                       | 360                                            | 252    | 74       | 53      | 21   | 44   |
| <b>USA (High Input System B)</b>           |                                                |                                     |                            |                                                |        |          |         |      |      |
| Maize                                      | 150                                            | 8.4                                 | 17.8                       | 338                                            | 236    | 69       | 50      | 20   | 41   |
| Wheat                                      | 63                                             | 2.9                                 | 21.7                       | 412                                            | 289    | 85       | 61      | 24   | 50   |
| Sorghum                                    | 90                                             | 4.2                                 | 21.3                       | 405                                            | 283    | 83       | 60      | 23   | 49   |
| <b>Mexico (Middle Input System A)</b>      |                                                |                                     |                            |                                                |        |          |         |      |      |
| Maize                                      | 60                                             | 2.3                                 | 25.6                       | 487                                            | 341    | 100      | 72      | 28   | 59   |
| Wheat                                      | 104                                            | 4.2                                 | 24.7                       | 470                                            | 329    | 96       | 69      | 27   | 57   |
| Sorghum                                    | 48                                             | 3.3                                 | 14.5                       | 275                                            | 193    | 56       | 41      | 16   | 33   |
| Barley                                     | 32                                             | 1.5                                 | 20.8                       | 396                                            | 277    | 81       | 58      | 23   | 48   |
| Soya                                       | 28.5                                           | 1.6                                 | 17.8                       | 339                                            | 237    | 70       | 50      | 20   | 41   |
| <b>Philippines (Middle Input System B)</b> |                                                |                                     |                            |                                                |        |          |         |      |      |
| Maize                                      | 46.4                                           | 1.8                                 | 25.5                       | 484                                            | 339    | 99       | 71      | 28   | 59   |
| Rice                                       | 43.35                                          | 3.2                                 | 13.6                       | 258                                            | 181    | 53       | 38      | 15   | 31   |
| Soya                                       | 4                                              | 1.2                                 | 3.3                        | 62                                             | 44     | 13       | 9       | 4    | 8    |
| <b>Tanzania (Low Input System)</b>         |                                                |                                     |                            |                                                |        |          |         |      |      |
| Maize                                      | 8                                              | 1.2                                 | 6.8                        | 130                                            | 91     | 27       | 19      | 8    | 16   |
| Millet                                     | 2                                              | 1.0                                 | 2.0                        | 39                                             | 27     | 8        | 6       | 2    | 5    |
| Sorghum                                    | 2                                              | 0.9                                 | 2.3                        | 44                                             | 31     | 9        | 6       | 3    | 5    |
| Rice                                       | 8                                              | 1.3                                 | 6.4                        | 121                                            | 85     | 25       | 18      | 7    | 15   |

Data sources: <sup>a</sup> FAO (2007); <sup>b</sup> FAO (2013a); <sup>c</sup> Calculations from the authors. See text for details.

### 3. Supplementary Material 3: Impact of Nutritional Value of Food Products on the Use of Resources

In this paper, the calculations of per capita use of nitrogen fertilizer and land were based on data of kilograms of food and not in data of other nutritional values such as calories or proteins. For the production data crop yield were used in ton per hectare, and for the consumption data kilograms of food supply per person were used (see Tables 1–3). Another approach to calculate the “footprints” (use of nitrogen fertilizer and land per person) would be to use the nutritional value of the food products; this means to base the calculation in terms of kilocalories, proteins or fats instead of kilograms. In order to do this, the values of Tables 1 and 2 should be converted into these units. In this appendix, we discuss the differences in nutritional value of the food products and the impact of doing this study using different nutritional units.

Table S3 show the nutritional content per 100 g of the food products used in this paper. The data was gathered from the Food Composition Tables given by the FAO.

**Table S3.** Nutritional content per 100 g of food product.

| Food Product                    | Kcal | Protein (g) | Fats (g) |
|---------------------------------|------|-------------|----------|
| wheat                           | 334  | 12.2        | 2.3      |
| rice paddy                      | 280  | 6           | 1.4      |
| maize                           | 356  | 9.5         | 4.3      |
| potatoes                        | 67   | 1.6         | 0.1      |
| sweet potatoes                  | 92   | 0.7         | 0.2      |
| beans, dry                      | 341  | 22.1        | 1.7      |
| pulses nes                      | 340  | 22          | 2        |
| sugar, centrifugal raw          | 373  | 0           | 0        |
| oil of soyabeans                | 884  | 0           | 100      |
| oil of sunflower seed           | 884  | 0           | 100      |
| oil of coconuts                 | 884  | 0           | 100      |
| oil of cotton seed              | 884  | 0           | 100      |
| cabbages                        | 19   | 1           | 0.1      |
| apples                          | 48   | 0.1         | 0.3      |
| beer barley                     | 49   | 0.5         | 0        |
| rice fermented beverage         | 133  | 0.3         | 0        |
| fermented beverages, cider etc. | 47   | 0.1         | 0        |
| beef boneless                   | 150  | 18.5        | 7.9      |
| chicken meat                    | 122  | 12.3        | 7.7      |
| mutton and lamb                 | 263  | 13.5        | 22.8     |
| pork                            | 220  | 13.4        | 18       |
| cow milk, whole fresh           | 61   | 3.3         | 3.3      |
| hen eggs                        | 139  | 10.7        | 9.8      |

Source: Food Composition Tables FAO: [http://www.fao.org/docrep/003/x9892e/X9892e05.htm#P8217\\_125315](http://www.fao.org/docrep/003/x9892e/X9892e05.htm#P8217_125315).

The nutritional content of each food product differs greatly depending on the type of food. For instance, oils have a relatively high content of calories and fats but no proteins; pulses have a relatively high content of proteins and calories but few fats; vegetables and fruits have a relatively low content of calories, and no proteins or fats; milk has a relatively high content of calories, proteins and fats in comparison with the meat products because of its high content of water.

By using the data from Table S3, we can calculate the data of Tables 1 and 2 in terms of different nutritional values such as kilocalories, proteins and fats (see Table S4). This table shows the fairly consistent differences among types of food products as Table S3 which was discussed above. For some food products and some nutritional values, this table shows that no nitrogen fertilizer was used. However, this does not mean that the production system does not use nitrogen fertilizer but means that the nutritional content of the food product is very small or nil. For example, the production of sugars show nil nitrogen fertilizer use per kg of protein or fat because of the low content of proteins and fats per gram of sugar. Therefore, it is important to note this because if the calculation of nitrogen fertilizer use was done based on proteins, then the production of sugars would show no use of nitrogen fertilizer. For this reason, we have made the calculations of nitrogen fertilizer use and land use per person per amount of food. Other studies have discussed the implications of studying the use of nitrogen fertilizer in relation to other nutritional values. For instance, Pierer et al. (2014) discuss the variations that result from using proteins or kilograms to calculate the use of nitrogen fertilizer.

**Table S4.** Data of Tables 1 and 2 in different nutritional values.

| <b>Production System</b>      | <b>Food Product</b>             | <b>g-N/kg Food<br/>(from Tables 1 and 2)</b> | <b>g-N/<br/>1000 Kcal</b> | <b>g-N/kg<br/>Protein</b> | <b>g-N/kg<br/>Fats</b> |
|-------------------------------|---------------------------------|----------------------------------------------|---------------------------|---------------------------|------------------------|
| <b>Cereals</b>                |                                 |                                              |                           |                           |                        |
| HIS B                         | Wheat                           | 21.7                                         | 6                         | 178                       | 943                    |
| HIS A                         | Wheat                           | 11.2                                         | 3                         | 92                        | 489                    |
| MIS B                         | Rice paddy                      | 17.5                                         | 6                         | 292                       | 1253                   |
| MIS A                         | Maize                           | 25.6                                         | 7                         | 270                       | 596                    |
| LIS                           | Maize                           | 6.8                                          | 2                         | 72                        | 159                    |
| <b>Roots</b>                  |                                 |                                              |                           |                           |                        |
| HIS B                         | Potatoes                        | 5.4                                          | 81                        | 340                       | 5439                   |
| HIS A                         | Potatoes                        | 0.9                                          | 13                        | 55                        | 885                    |
| MIS B                         | Potatoes                        | 5.5                                          | 82                        | 343                       | 5482                   |
| MIS A                         | Potatoes                        | 5.3                                          | 79                        | 329                       | 5269                   |
| LIS                           | Sweet potatoes                  | 0.3                                          | 3                         | 39                        | 136                    |
| <b>Pulses</b>                 |                                 |                                              |                           |                           |                        |
| HIS B                         | Beans, dry                      | 36.0                                         | 106                       | 163                       | 2118                   |
| HIS A                         | Beans, dry                      | 49.2                                         | 144                       | 223                       | 2897                   |
| MIS B                         | Beans, dry                      | 10.0                                         | 29                        | 45                        | 590                    |
| MIS A                         | Beans, dry                      | 28.1                                         | 82                        | 127                       | 1653                   |
| LIS                           | Pulses nes                      | 1.5                                          | 4                         | 7                         | 73                     |
| <b>Sugar &amp; Sweeteners</b> |                                 |                                              |                           |                           |                        |
| HIS B                         | Sugar (Raw Eq.) from sugar beet | 12.7                                         | 34                        | 0                         | 0                      |
| HIS A                         | Sugar (Raw Eq.) from sugar beet | 10.2                                         | 27                        | 0                         | 0                      |
| MIS B                         | Sugar (Raw Eq.) from sugar cane | 12.1                                         | 32                        | 0                         | 0                      |
| MIS A                         | Sugar (Raw Eq.) from sugar cane | 14.4                                         | 39                        | 0                         | 0                      |
| LIS                           | Sugar (Raw Eq.) from sugar cane | 0.1                                          | 0                         | 0                         | 0                      |
| <b>Vegetable Oils</b>         |                                 |                                              |                           |                           |                        |
| HIS B                         | oil of soyabeans                | 21.2                                         | 24                        | 0                         | 21                     |
| HIS A                         | oil of sunflower seed           | 148.3                                        | 168                       | 0                         | 148                    |
| MIS B                         | oil of coconuts                 | 6.9                                          | 8                         | 0                         | 7                      |
| MIS A                         | oil of sunflower seed           | 226.5                                        | 256                       | 0                         | 227                    |
| LIS                           | oil of cotton seed              | 66.9                                         | 76                        | 0                         | 67                     |
| <b>Vegetables *</b>           |                                 |                                              |                           |                           |                        |
| HIS B                         | Cabbages                        | 6.7                                          | 351                       | 668                       | 6677                   |
| HIS A                         | Cabbages                        | 2.0                                          | 104                       | 198                       | 1978                   |
| MIS B                         | Cabbages                        | 0.0                                          | 0                         | 0                         | 3                      |
| MIS A                         | Cabbages                        | 2.7                                          | 140                       | 266                       | 2664                   |
| LIS                           | Cabbages                        | 1.5                                          | 81                        | 154                       | 1540                   |
| <b>Fruits *</b>               |                                 |                                              |                           |                           |                        |
| HIS B                         | Apples                          | 3.9                                          | 80                        | 3863                      | 1288                   |
| HIS A                         | Apples                          | 4.6                                          | 95                        | 4576                      | 1525                   |
| MIS B                         | Apples                          | 3.3                                          | 69                        | 3321                      | 1107                   |
| MIS A                         | Apples                          | 3.5                                          | 74                        | 3529                      | 1176                   |
| LIS                           | Apples                          | 0.3                                          | 7                         | 322                       | 107                    |
| <b>Alcoholic Beverages</b>    |                                 |                                              |                           |                           |                        |
| HIS B                         | Beer barley                     | 2.8                                          | 57                        | 557                       | 0                      |
| HIS A                         | Beer barley                     | 2.8                                          | 58                        | 569                       | 0                      |
| MIS B                         | rice fermented beverage         | 2.4                                          | 18                        | 794                       | 0                      |
| MIS A                         | Beer barley                     | 3.1                                          | 64                        | 625                       | 0                      |
| LIS                           | fermented beverages, cider etc. | 0.1                                          | 2                         | 108                       | 0                      |

Table S4. Cont.

| Production System      | Food Product          | g-N/kg Food<br>(from Tables 1 and 2) | g-N/<br>1000 Kcal | g-N/kg<br>Protein | g-N/kg<br>Fats |
|------------------------|-----------------------|--------------------------------------|-------------------|-------------------|----------------|
| <b>Animal products</b> |                       |                                      |                   |                   |                |
| HIS B                  | beef boneless         | 338                                  | 2252              | 1826              | 4275           |
| HIS A                  | beef boneless         | 356                                  | 2372              | 1924              | 4504           |
| MIS B                  | beef boneless         | 484                                  | 3230              | 2619              | 6132           |
| MIS A                  | beef boneless         | 487                                  | 3244              | 2630              | 6159           |
| LIS                    | beef boneless         | 130                                  | 866               | 702               | 1643           |
| HIS B                  | Mutton and lamb       | 236                                  | 899               | 1751              | 1037           |
| HIS A                  | Mutton and lamb       | 249                                  | 947               | 1845              | 1093           |
| MIS B                  | Mutton and lamb       | 339                                  | 1289              | 2512              | 1487           |
| MIS A                  | Mutton and lamb       | 341                                  | 1295              | 2523              | 1494           |
| LIS                    | Mutton and lamb       | 91                                   | 346               | 673               | 399            |
| HIS B                  | Pork                  | 69                                   | 315               | 517               | 385            |
| HIS A                  | Pork                  | 73                                   | 332               | 545               | 406            |
| MIS B                  | Pork                  | 99                                   | 452               | 742               | 552            |
| MIS A                  | Pork                  | 100                                  | 454               | 745               | 555            |
| LIS                    | Pork                  | 27                                   | 121               | 199               | 148            |
| HIS B                  | Chicken meat          | 50                                   | 408               | 405               | 646            |
| HIS A                  | Chicken meat          | 52                                   | 430               | 426               | 681            |
| MIS B                  | Chicken meat          | 71                                   | 585               | 580               | 927            |
| MIS A                  | Chicken meat          | 72                                   | 588               | 583               | 931            |
| LIS                    | Chicken meat          | 19                                   | 157               | 156               | 248            |
| HIS B                  | Cow milk, whole fresh | 20                                   | 321               | 593               | 593            |
| HIS A                  | Cow milk, whole fresh | 21                                   | 338               | 624               | 624            |
| MIS B                  | Cow milk, whole fresh | 28                                   | 460               | 850               | 850            |
| MIS A                  | Cow milk, whole fresh | 28                                   | 462               | 854               | 854            |
| LIS                    | Cow milk, whole fresh | 8                                    | 123               | 228               | 228            |
| HIS B                  | hen eggs              | 41                                   | 294               | 382               | 417            |
| HIS A                  | hen eggs              | 43                                   | 310               | 403               | 440            |
| MIS B                  | hen eggs              | 59                                   | 422               | 548               | 598            |
| MIS A                  | hen eggs              | 59                                   | 424               | 550               | 601            |
| LIS                    | hen eggs              | 16                                   | 113               | 147               | 160            |

\* For vegetables and fruits, Tables 1 and 2 was calculated using the average values for total vegetables and total fruits given by the FAO, for this tables, we used cabbages and apples as examples of vegetables and fruits to illustrate the differences in the use of N per kilograms, kcal, protein and fats.

#### 4. Supplementary Material 4

In this supplementary material, we present the data of Figures 1 and 2 to be able to compare diets and production systems more easily among these figures.

Table S5. Data of Figure 1.

| Food Categories                | HIS A & Affluent Diet A |                     | HIS B & Affluent Diet B |                     | MIS A & Transition Diet A |                     | MIS B & Transition Diet B |                     | LIS & Basic Diet |                     |
|--------------------------------|-------------------------|---------------------|-------------------------|---------------------|---------------------------|---------------------|---------------------------|---------------------|------------------|---------------------|
|                                | kg-N-cap                | m <sup>2</sup> -cap | kg-N-cap                | m <sup>2</sup> -cap | kg-N-cap                  | m <sup>2</sup> -cap | kg-N-cap                  | m <sup>2</sup> -cap | kg-N-cap         | m <sup>2</sup> -cap |
| Staple food                    | 1.5                     | 188                 | 2.8                     | 389                 | 4.6                       | 905                 | 2.89                      | 672                 | 0.8              | 2061                |
| Affluent vegetal food products | 4.7                     | 451                 | 2.9                     | 490                 | 3.8                       | 664                 | 0.75                      | 286                 | 0.5              | 881                 |
| Animal food products           | 19.0                    | 1119                | 23.7                    | 1577                | 16.7                      | 2786                | 5.50                      | 1185                | 1.3              | 1614                |
| TOTAL                          | 25                      | 1758                | 29                      | 2456                | 25                        | 4355                | 9                         | 2142                | 3                | 4557                |

Table S.6. Data of Figure 2.

| Food Categories                | Affluent Diet               |                     |                             |                     |                               |                     |                               |                     |                        |                     |
|--------------------------------|-----------------------------|---------------------|-----------------------------|---------------------|-------------------------------|---------------------|-------------------------------|---------------------|------------------------|---------------------|
|                                | High Input System A (HIS A) |                     | High Input System B (HIS B) |                     | Middle Input System A (MIS A) |                     | Middle Input System B (MIS B) |                     | Low Input System (LIS) |                     |
|                                | kg-N-cap                    | m <sup>2</sup> -cap | kg-N-cap                    | m <sup>2</sup> -cap | kg-N-cap                      | m <sup>2</sup> -cap | kg-N-cap                      | m <sup>2</sup> -cap | kg-N-cap               | m <sup>2</sup> -cap |
| Staple food                    | 1.5                         | 181                 | 2.8                         | 389                 | 3.2                           | 566                 | 2.26                          | 544                 | 0.8                    | 1299                |
| affluent vegetal food products | 5.8                         | 543                 | 2.9                         | 490                 | 8.3                           | 1431                | 1.57                          | 733                 | 2.1                    | 2825                |
| animal food products           | 24.9                        | 1466                | 23.7                        | 1577                | 34.1                          | 5681                | 33.94                         | 7314                | 9.1                    | 11,369              |
| TOTAL                          | 32                          | 2190                | 29                          | 2456                | 46                            | 7678                | 38                            | 8591                | 12                     | 15,493              |
|                                | Transition Diet             |                     |                             |                     |                               |                     |                               |                     |                        |                     |
|                                | High Input System A (HIS A) |                     | High Input System B (HIS B) |                     | Middle Input System A (MIS A) |                     | Middle Input System B (MIS B) |                     | Low Input System (LIS) |                     |
|                                | kg-N-cap                    | m <sup>2</sup> -cap | kg-N-cap                    | m <sup>2</sup> -cap | kg-N-cap                      | m <sup>2</sup> -cap | kg-N-cap                      | m <sup>2</sup> -cap | kg-N-cap               | m <sup>2</sup> -cap |
| Staple food                    | 2.4                         | 271                 | 4.0                         | 564                 | 4.6                           | 905                 | 3.05                          | 831                 | 1.1                    | 1646                |
| affluent vegetal food products | 2.8                         | 293                 | 1.8                         | 254                 | 3.8                           | 664                 | 1.20                          | 408                 | 0.8                    | 1345                |
| animal food products           | 12.2                        | 719                 | 11.6                        | 773                 | 16.7                          | 2786                | 16.64                         | 3586                | 4.5                    | 5574                |
| TOTAL                          | 17                          | 1283                | 17                          | 1592                | 25                            | 4355                | 21                            | 4825                | 6                      | 8566                |
|                                | Basic Diet                  |                     |                             |                     |                               |                     |                               |                     |                        |                     |
|                                | High Input System A (HIS A) |                     | High Input System B (HIS B) |                     | Middle Input System A (MIS A) |                     | Middle Input System B (MIS B) |                     | Low Input System (LIS) |                     |
|                                | kg-N-cap                    | m <sup>2</sup> -cap | kg-N-cap                    | m <sup>2</sup> -cap | kg-N-cap                      | m <sup>2</sup> -cap | kg-N-cap                      | m <sup>2</sup> -cap | kg-N-cap               | m <sup>2</sup> -cap |
| Staple food                    | 2.3                         | 253                 | 3.9                         | 408                 | 4.1                           | 861                 | 2.92                          | 818                 | 0.8                    | 2061                |
| affluent vegetal food products | 1.7                         | 184                 | 1.0                         | 152                 | 2.2                           | 420                 | 0.57                          | 237                 | 0.5                    | 881                 |
| animal food products           | 3.5                         | 208                 | 3.4                         | 224                 | 4.8                           | 807                 | 4.82                          | 1038                | 1.3                    | 1614                |
| TOTAL                          | 8                           | 645                 | 8                           | 784                 | 11                            | 2087                | 8                             | 2094                | 3                      | 4557                |
